# Supplementary figures and images for: Differential Locus Expansion Distinguishes Toxoplasmatinae Species and Closely Related Strains of Toxoplasma gondii
Source: PubMed Central journal article supplement — mBio. 2014 Feb 4;5(1):e01003-13. doi: 10.1128/mBio.01003-13 (PMC3950507; doi:10.1128/mbio.01003-13), 2014-02-04

Figure S2A:

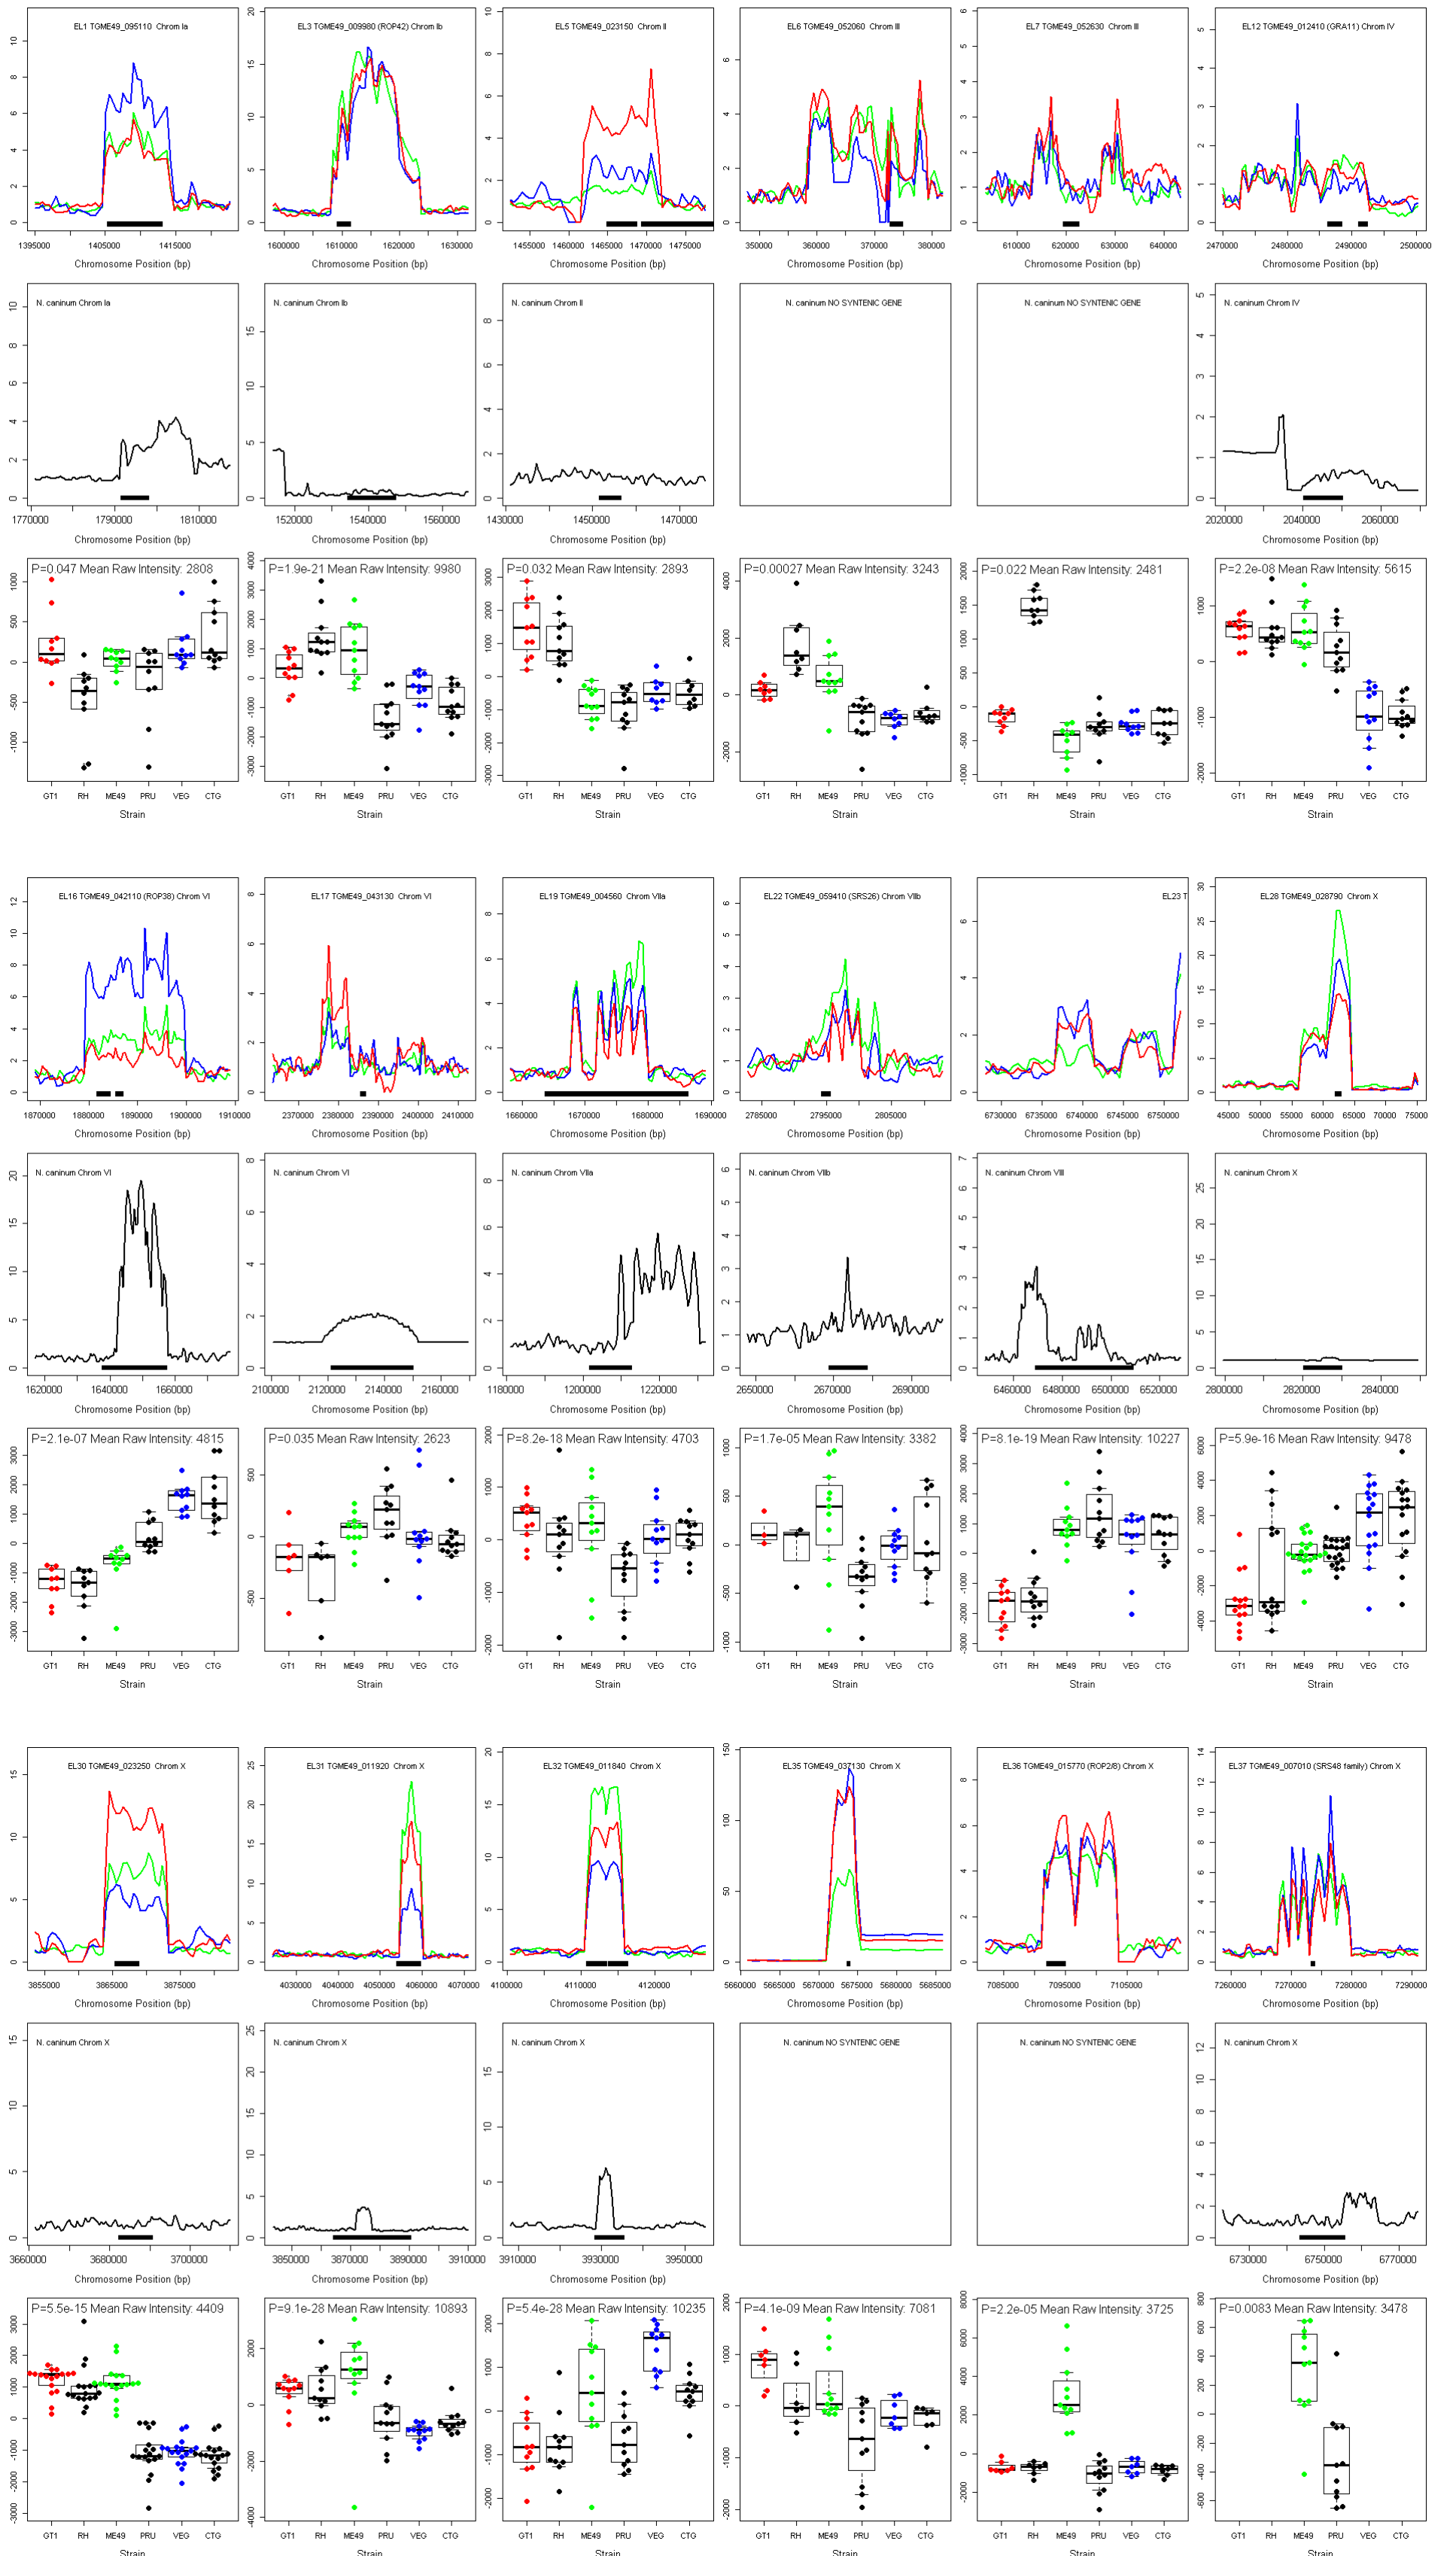

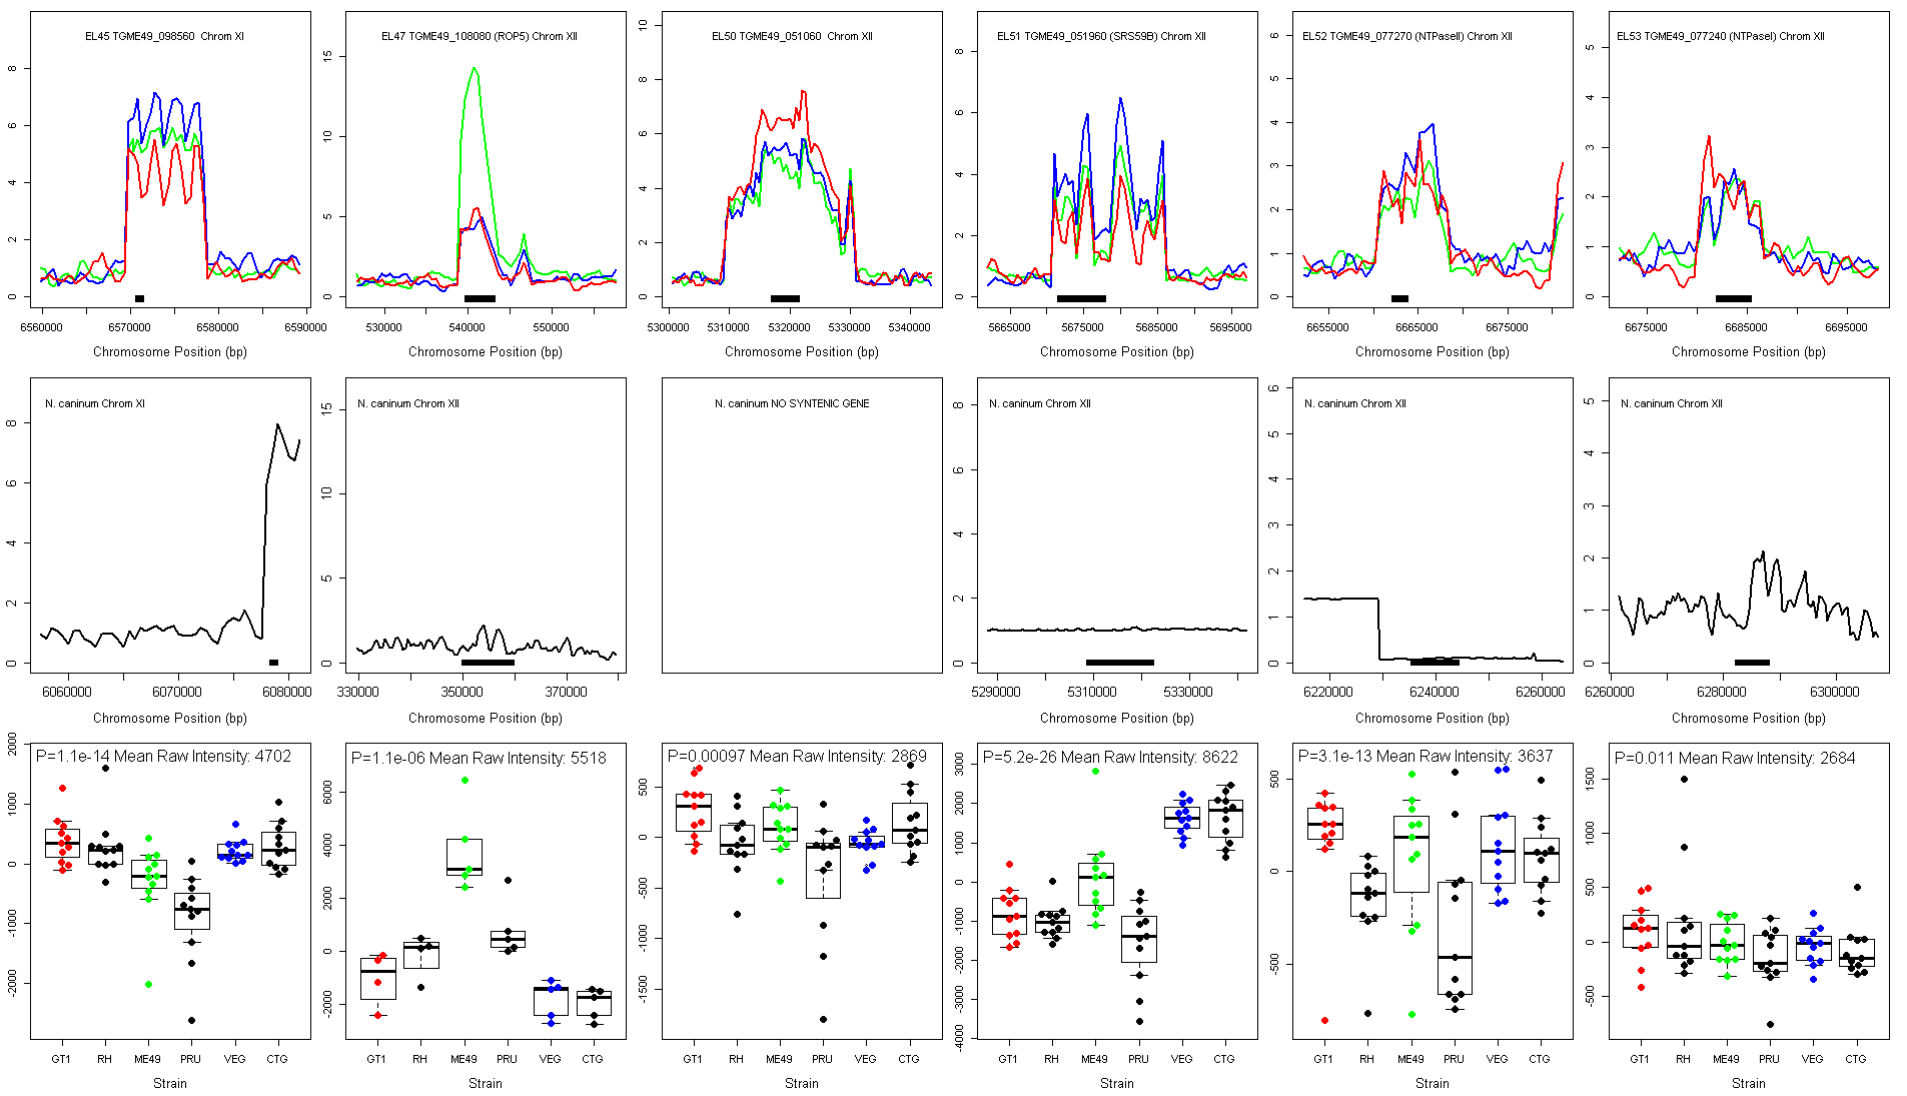

Figure S2B:

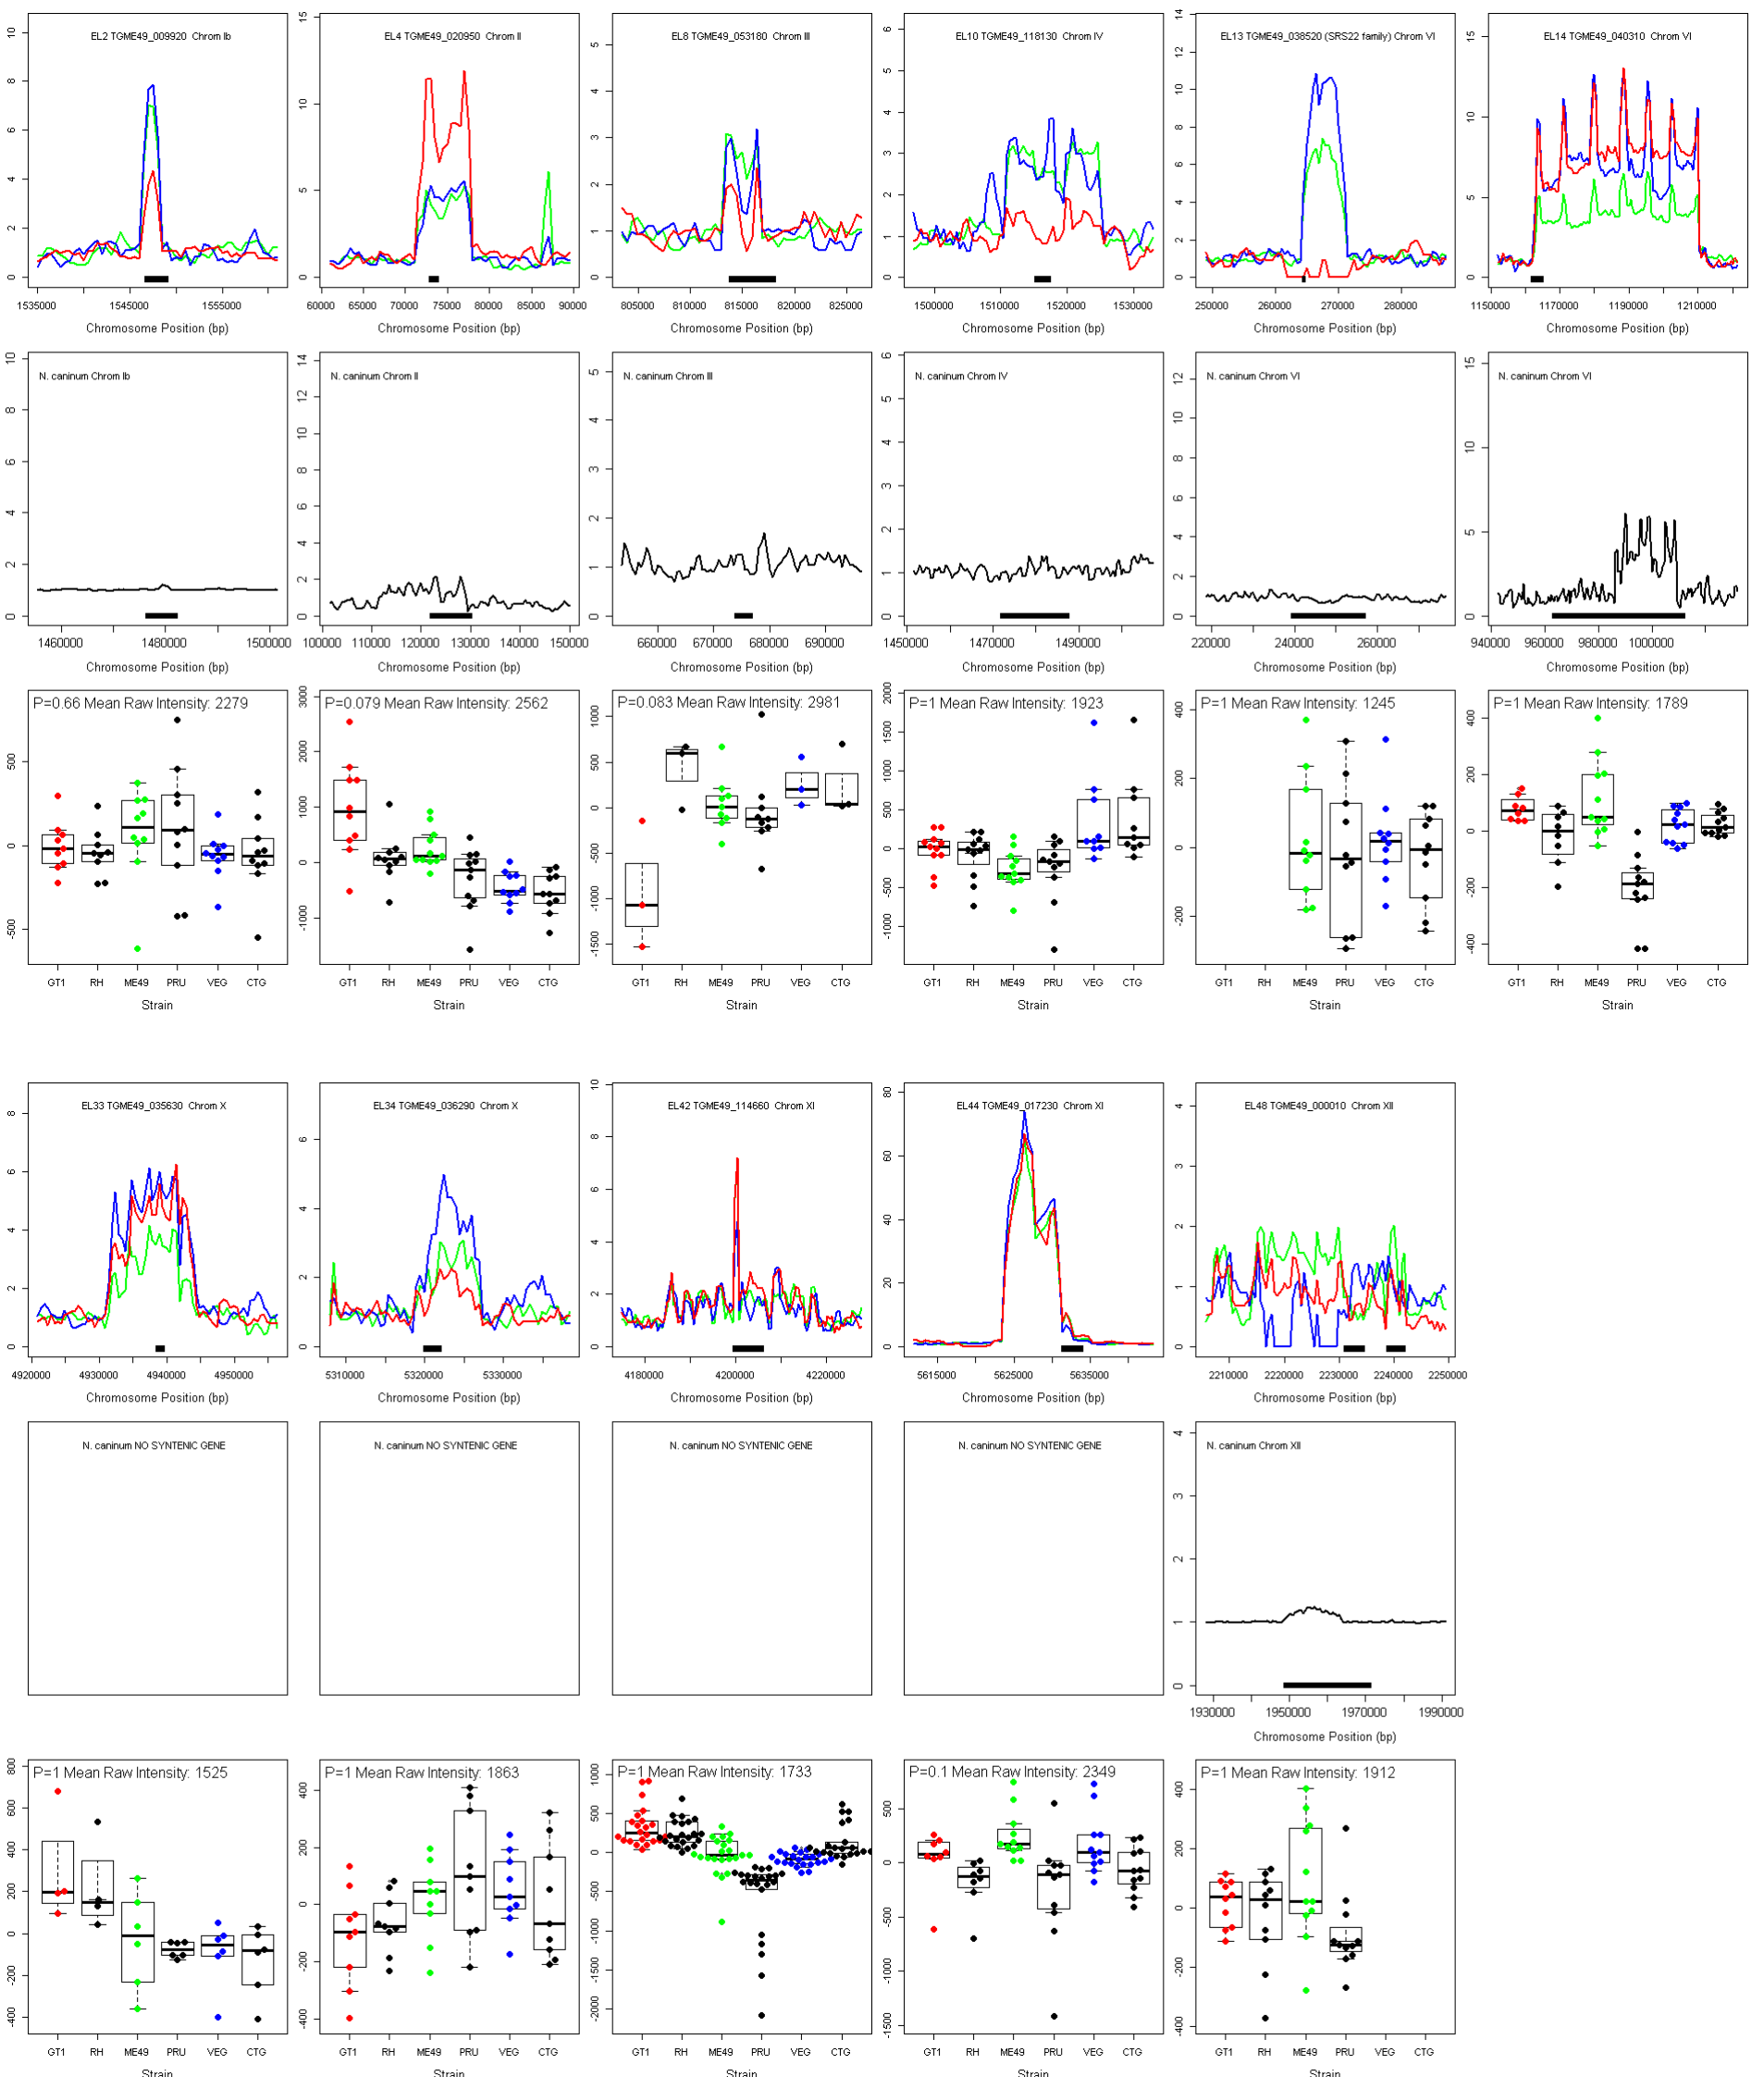

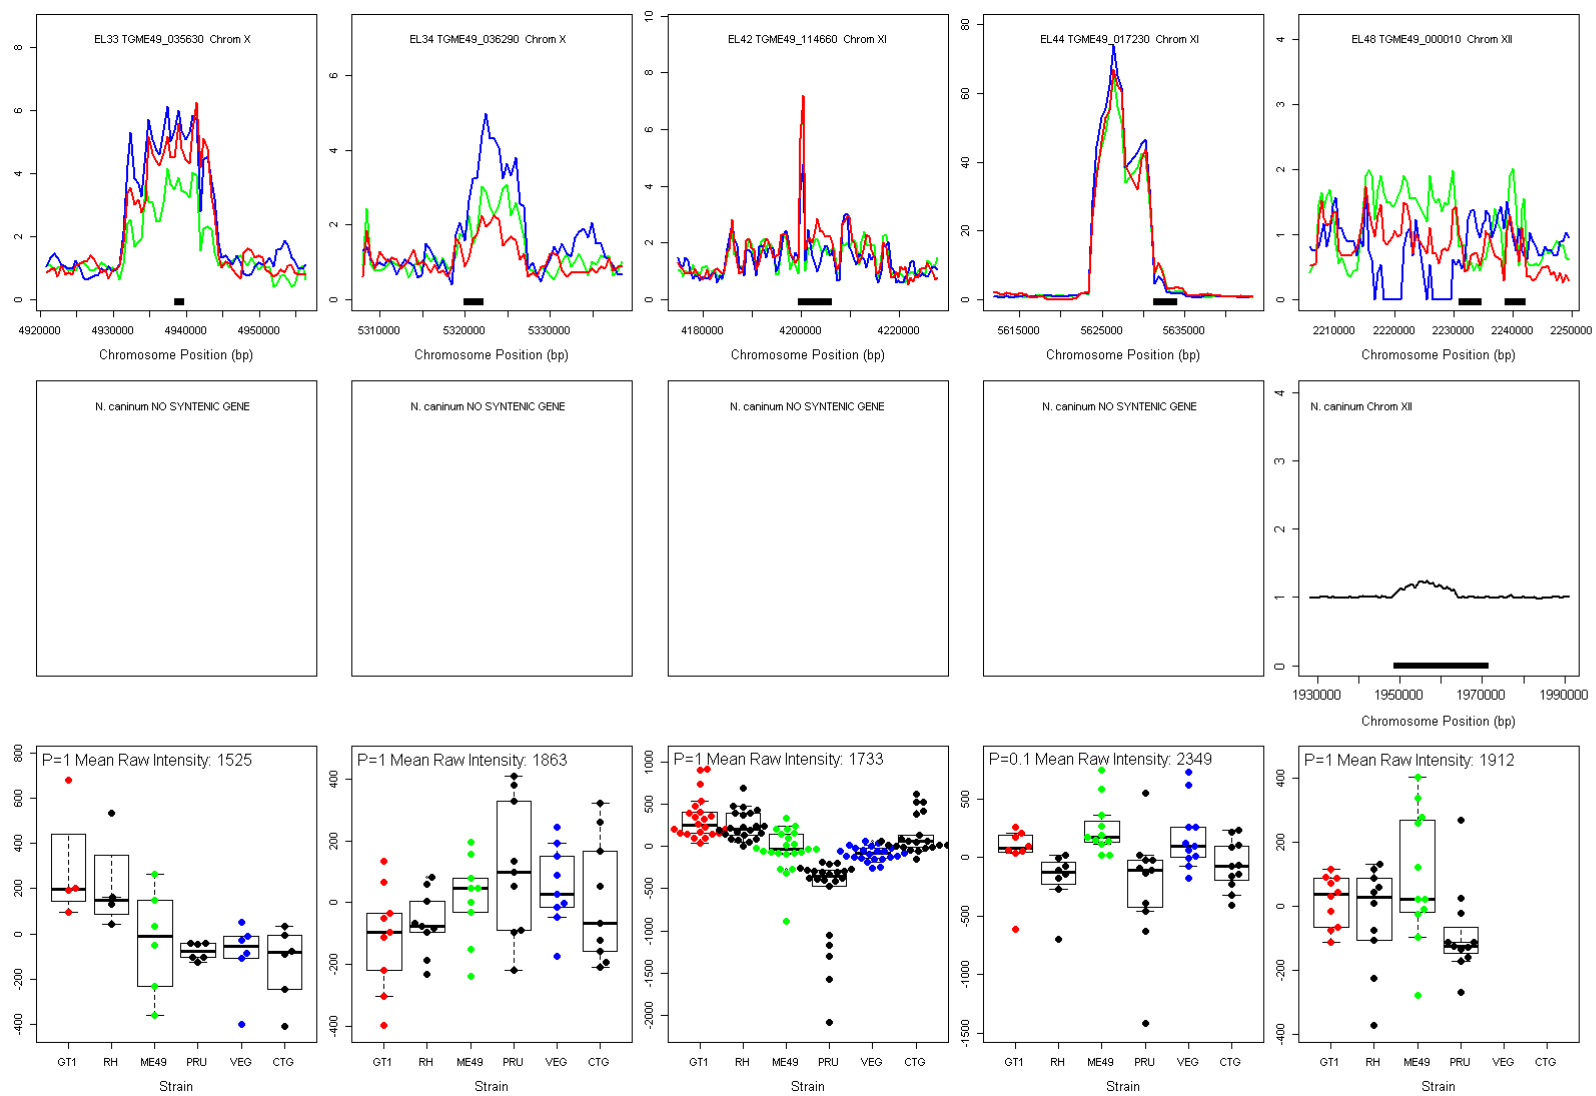

Figure S2C:

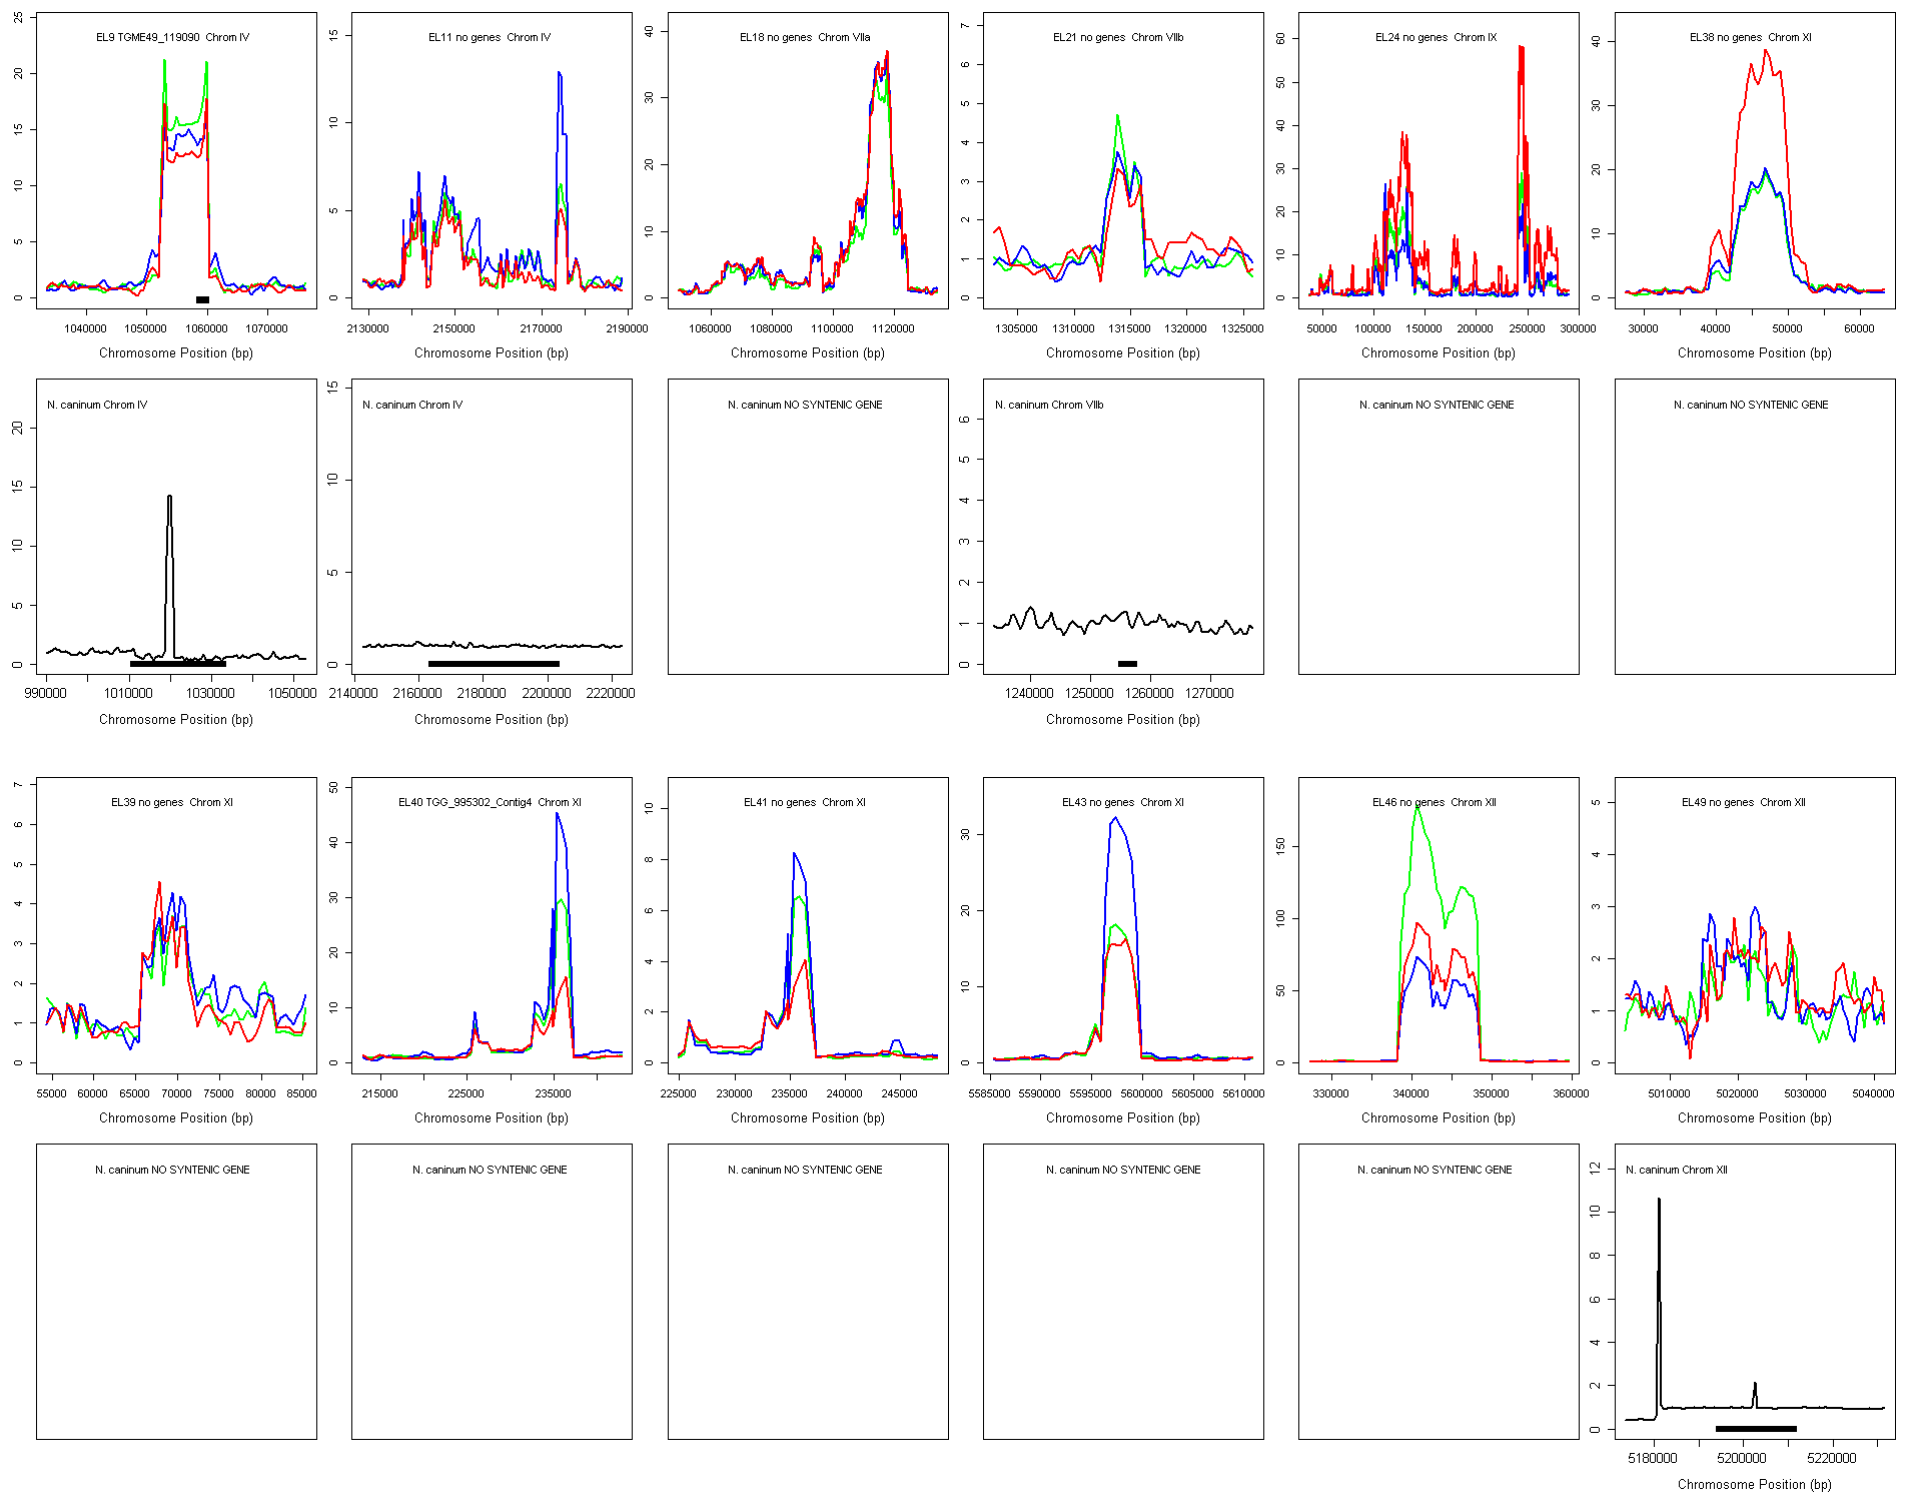

Supplement: mbo001141725so2.pdf [file mbo001141725so2.pdf]
